# Supplementary material
Source: PubMed Central journal article supplement (PMC4029107)
Supplement: NIHMS577205-supplement-Supplemental_Digital_Content.pdf [file NIHMS577205-supplement-Supplemental_Digital_Content.pdf]

**Appendix. List of Centers in the Eunice Kennedy Shriver National Institute of Child Health and Human Development Maternal-Fetal Medicine Units Network**

In addition to the authors, other members of the *Eunice Kennedy Shriver* National Institute of Child Health and Human Development Maternal-Fetal Medicine Units Network are as follows:

*University of Alabama at Birmingham* – D. Rouse, J. Sheppard, J. Tisdale, A. Northen, W. Andrews.

*University of Texas Southwestern Medical Center* – K. Leveno, L. Moseley, J. Gold, D. Bradford, L. Fay, M. Garcia, F. Capellan.

*Columbia University* – M. Miodovnik, F. Malone, S. Bousleiman, H. Husami, V. Carmona, N. Fredericks, E. Gantioqui, B. Greenspan, M. Williams.

*University of Utah* – K Anderson, P. Ashby, S. McAllister (University of Utah Health Sciences Center); S. Quinn, F. Castinella (LDS Hospital); A. Guzman, J. Steiner (McKay-Dee Hospital); J. Parker (Utah Valley Regional Medical Center).

*Brown University* –M. Carpenter, D. Catlow, D. Allard, M. Seebeck, J. Tillinghast.

*The Ohio State University* – J. Iams, F. Johnson, C. Latimer, E. Weinandy, B. Maselli.

*University of North Carolina at Chapel Hill* – K. Dorman, S. Brody, S. Timlin, J. Bernhardt.

*Drexel University* – M. Hoffman, E. Guzman, M. Talucci, T. Grossman, C. Perez, L. Zeghibe, P. Tabangin.

Figueroa D, Landon MB, Mele L, Spong CY, Ramin SM, Casey B, et al. Relationship between 1-hour glucose loading test results and perinatal outcomes. *Obstet Gynecol* 2012;120.

The authors provided this information as a supplement to their article.

*Case Western Reserve University-MetroHealth Medical Center* – B. Mercer, B. Stetzer, C. Milluzzi, W. Dalton, S. Pichette.

*Wake Forest University Health Sciences* – M. Swain, P. Meis, J. White.

*The University of Texas Health Science Center at Houston* – L. Gilstrap, K. Cannon, J. Martinez, D. Dusek.

*University of Texas Medical Branch* – J. Moss, J. Brandon, A. Jackson, G. Hankins, D. Sharp.

*University of Pittsburgh* – M. Bickus, H. Birkland, M. Cotroneo, N. Cuddy.

*Wayne State University* – G. Norman, P. Lockhart, S. Blackwell, L. Quast.

*Northwestern University* – P. Simon, G. Mallett.

*Oregon Health & Science University* - L. Davis, E. Lairson, C. Cromett, C. Naze, M. Blaser.

*The George Washington University Biostatistics Center* – E.Thom, J. Zachary, B. Getachew, C. Cobb, L. Leuchtenburg, S. Gilbert.

*Eunice Kennedy Shriver National Institute of Child Health and Human Development* – S. Tolivaisa, K. Howell.

MFMU Network Steering Committee Chair (*University of Texas Medical Branch, Galveston, TX*) – G.D. Anderson, M.D.

Figueroa D, Landon MB, Mele L, Spong CY, Ramin SM, Casey B, et al. Relationship between 1-hour glucose loading test results and perinatal outcomes. *Obstet Gynecol* 2012;120.

The authors provided this information as a supplement to their article.
